# Supplementary material
Source: MDPI journal article supplement (https://www.mdpi.com/2071-1050/8/10/984)
Supplement: s1 [file s1]

# Supplementary Materials: Technical Performance and Environmental Effects of the Treated Effluent of Wastewater Treatment Plants in Shenzhen Bay Catchment, China

Bo Li, Dan Wang, Mingyuan Li, Jie Wei and Guangxue Wu

**Table S1.** The clarification level for  $E_r^i$  and RI.

| Grades of Potential Ecological Risk | $E_r^i$                | RI                         |
|-------------------------------------|------------------------|----------------------------|
| Low risk (LR)                       | $E_r^i < 40$           | RI < 150                   |
| Moderate risk (MR)                  | $40 \leq E_r^i < 80$   | $150 \leq \text{RI} < 300$ |
| Considerable risk (CR)              | $80 \leq E_r^i < 160$  | $300 \leq \text{RI} < 600$ |
| High risk (HR)                      | $160 \leq E_r^i < 320$ | -                          |
| Very high risk (VHR)                | $E_r^i \geq 320$       | RI $\geq 600$              |
